# Supplementary material for: The impact of nitrogen gas flushing on the stability of seasonings: volatile compounds and sensory perception of cheese & onion seasoned potato crisps
Source: Royal Society of Chemistry journal article supplement (doi:10.1039/c8fo00817e), 2018-01-01
Supplement: c8fo00817e1.pdf [file c8fo00817e1.pdf]

# Supporting information

## Supplemental Figures

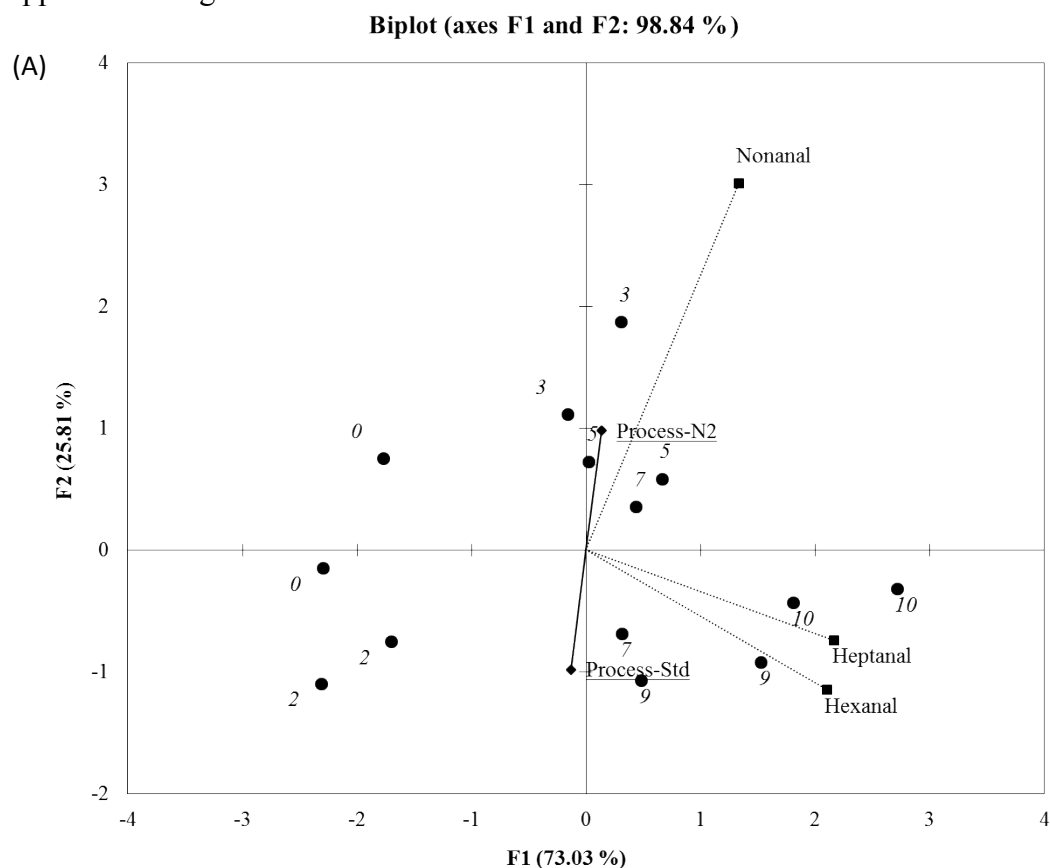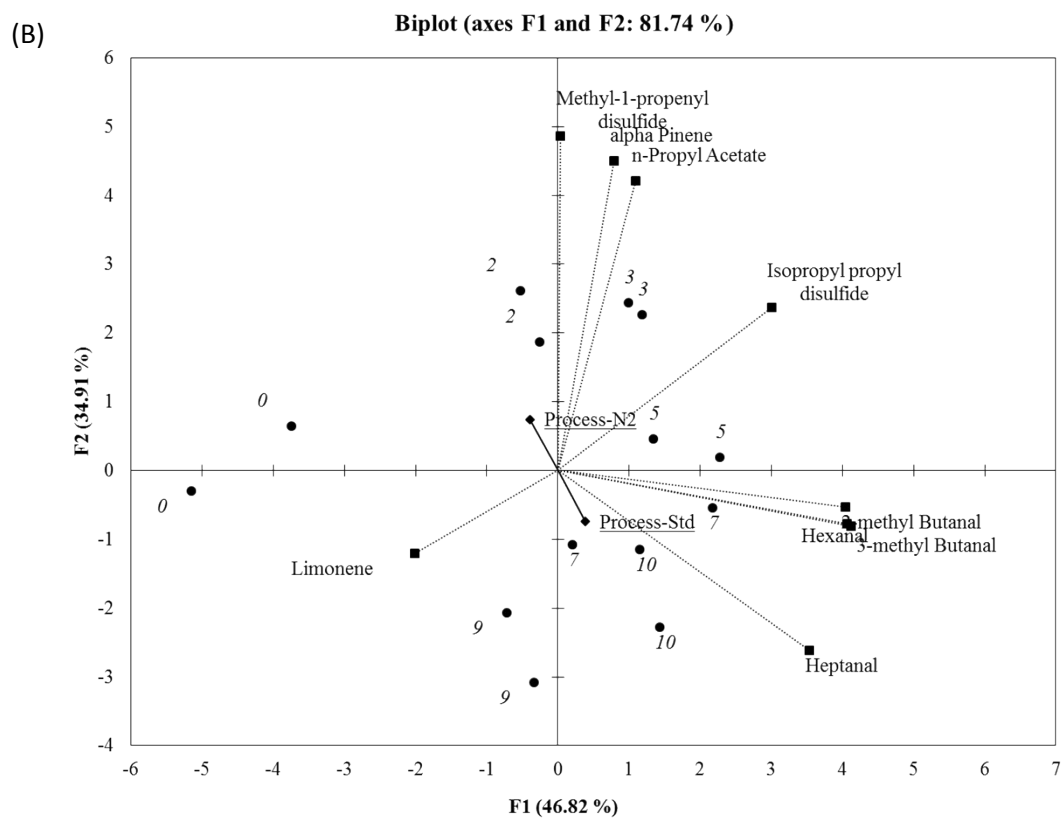

32 **Figure S1:** Principal component analysis map (PC1 and PC2) involving the quantities of the  
33 significant components such as different packaging environment (*italic*), storage time  
34 (*italic*) and volatile compounds attributes, where (A) Unsalted potato crisps, and (B) Cheese  
35 & onion seasoned potato crisps.

#### 36 Summary of all samples via Principal Component Analysis

37 Principal component analysis (PCA) was used to illustrate the difference between all volatiles  
38 associated with unsalted and C&O seasoned potato crisps with increasing storage time and  
39 controlled packaging environment. For unsalted crisps, the first principal component (PC1)  
40 accounted for 73.03% of the variance in the dataset and showed a trend with the amount of  
41 aldehydes from top to bottom and different storage time. The second principal component  
42 (PC2) accounted for 25.81% of the variance and showed separation between the N<sub>2</sub> gas flushing  
43 (top) and without N<sub>2</sub> gas flushing packaging (bottom). Similarly, for cheese & onion seasoned  
44 potato crisps, the first principal component (PC1) accounted for 46.82% of the variance in the  
45 dataset and showed a trend with terpenes, acetate and disulphides (top) and aldehydes (bottom)  
46 and different storage time. The second principal component (PC2) accounted for 34.91% of  
47 the variance and showed separation between the packaging environments *i.e.*, crisps packed  
48 with N<sub>2</sub> gas flushing (top) and crisps packed without N<sub>2</sub> gas flushing (bottom). Disulphides and  
49 terpenes were positively correlated and aldehydes such as hexanal, heptanal were negatively  
50 correlated. There were visible differences between packaging environment (*i.e.* with or with  
51 N<sub>2</sub> gas flushing) with both unsalted and C&O seasoned potato crisps, characterised by these  
52 samples being located in different corners of the PCA plot.
